# Supplementary material
Source: publisher figshare collection journal article supplement (https://frontiersin.figshare.com/ndownloader/files/14036609)
Supplement: Supplementary file [file 14036609]

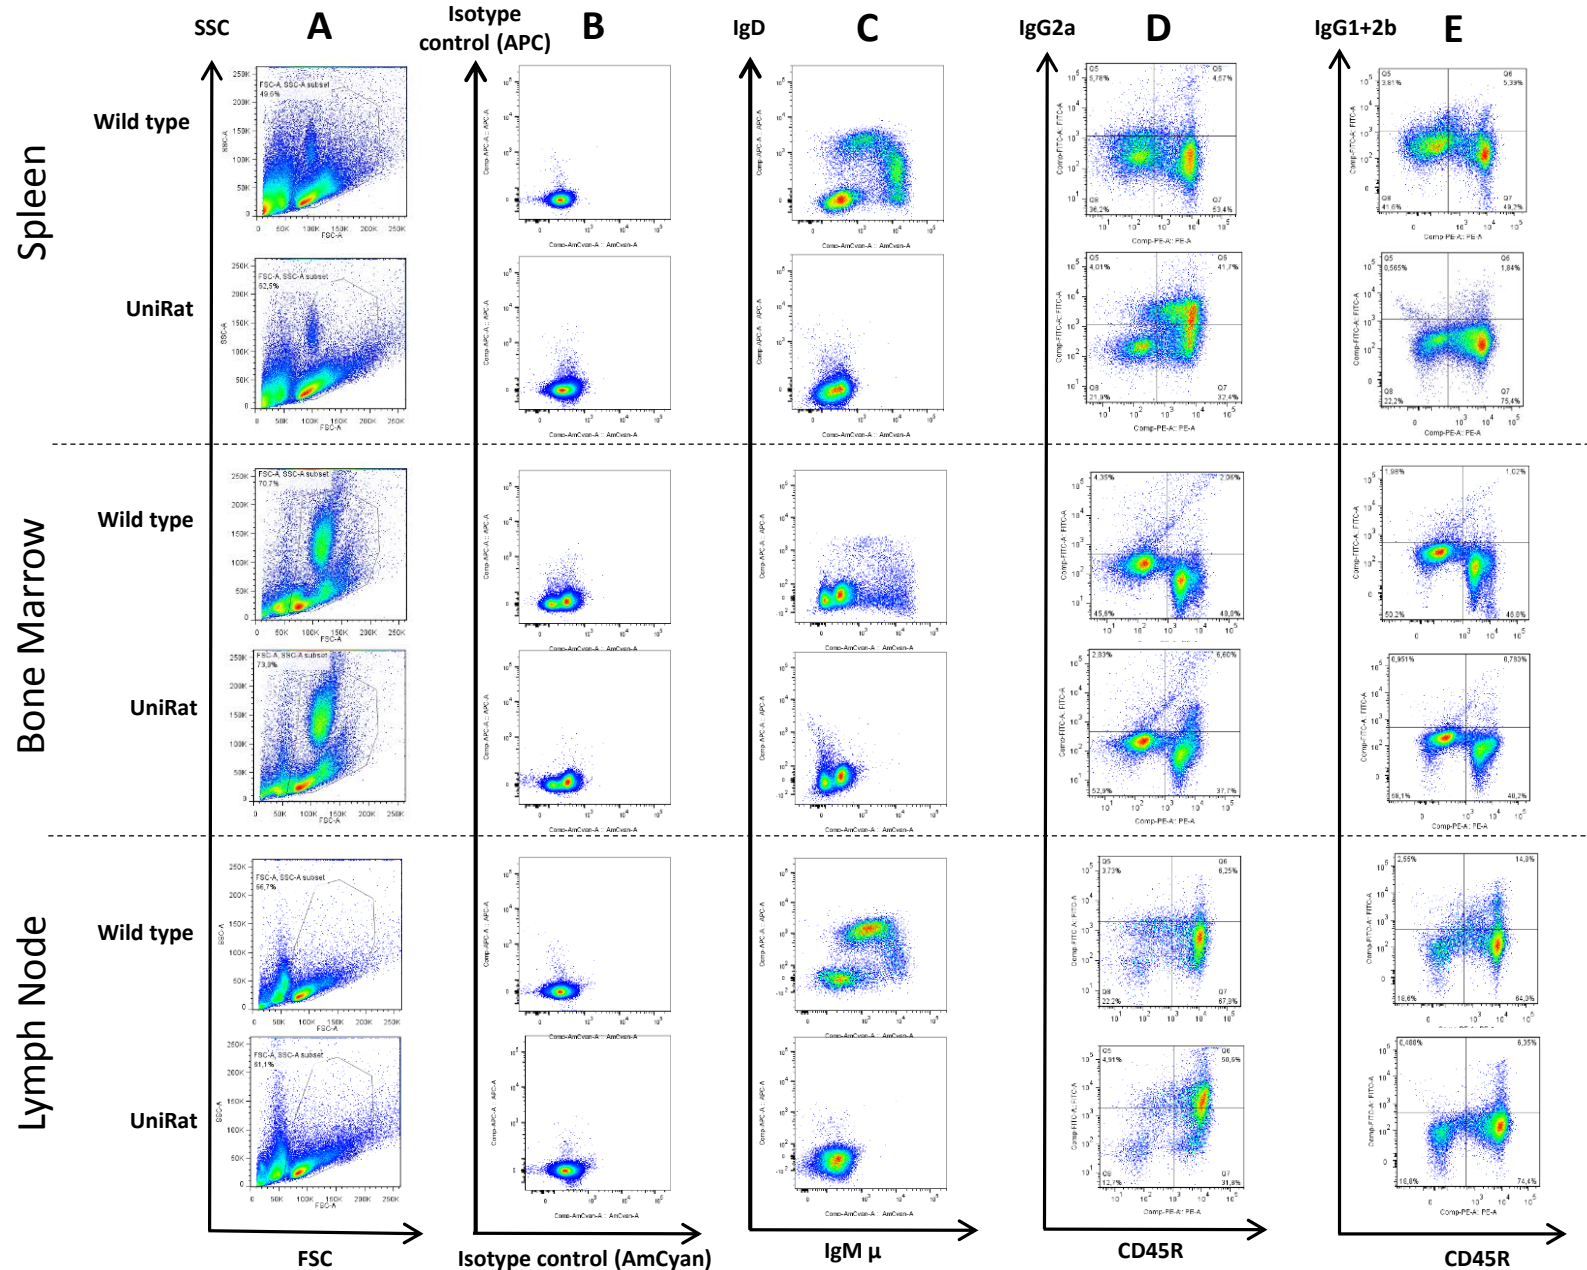

**Supplemental Figure 1.** Characterization of B cells isolated from the spleens, bone marrow and lymph nodes of UniRats compared to wild type rats after immunization with  $\beta$ -galactosidase. Data from a representative wild type and UniRat animal are shown. (A) Forward and side scatter, (B) Isotype controls for anti-IgD and anti-IgM staining, (C) IgD and IgM are not produced by UniRats, (D) IgG2a+ B cells are produced at higher numbers in UniRats, (E) IgG1+ and IgG2+ B cells are present at equivalent or slightly lower levels in UniRats compared to wild type rats. Group size of n=4 analyzed.
